# Supplementary material
Source: PubMed Central journal article supplement (PMC102696)
Supplement: nar_28_13_2527__1.pdf [file nar_28_13_2527__1.pdf]

## SUPPLEMENTARY MATERIAL

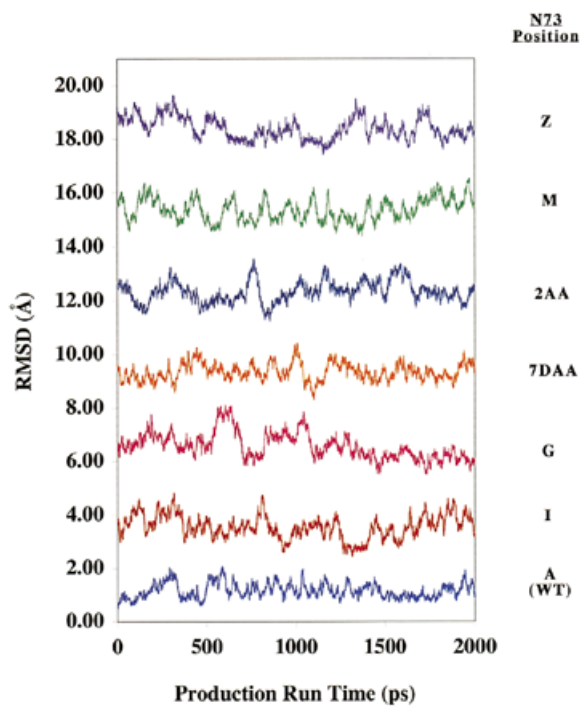

**Figure S1.** RMSDs (Å) from initial structures taken over the production run portion of each trajectory. Values have an arbitrary 0 and are calculated excluding the single-stranded region of the microhelix.

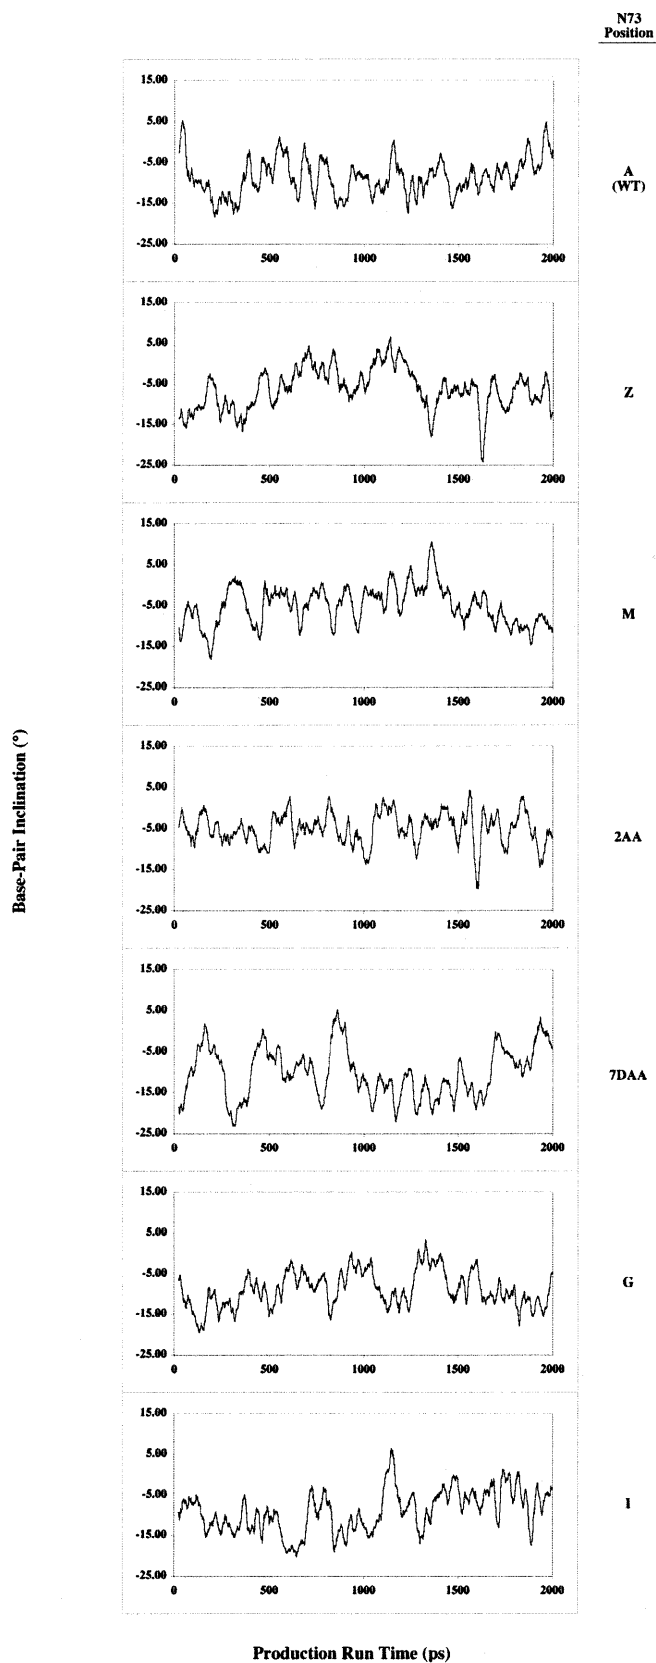

Figure S2. Average base pair inclinations (°) taken over the production run portion of each trajectory.

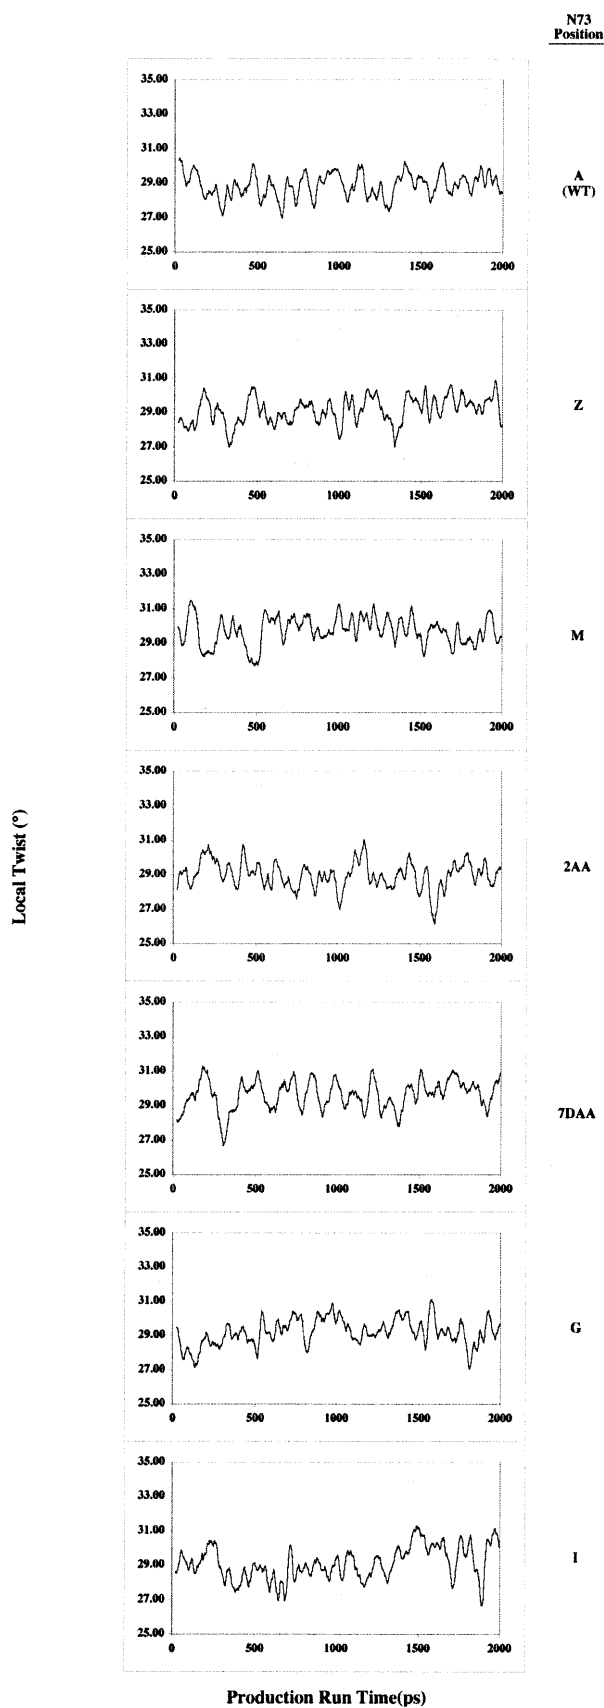

Figure S3. Average local helical twist (°) taken over the production run portion of each trajectory.

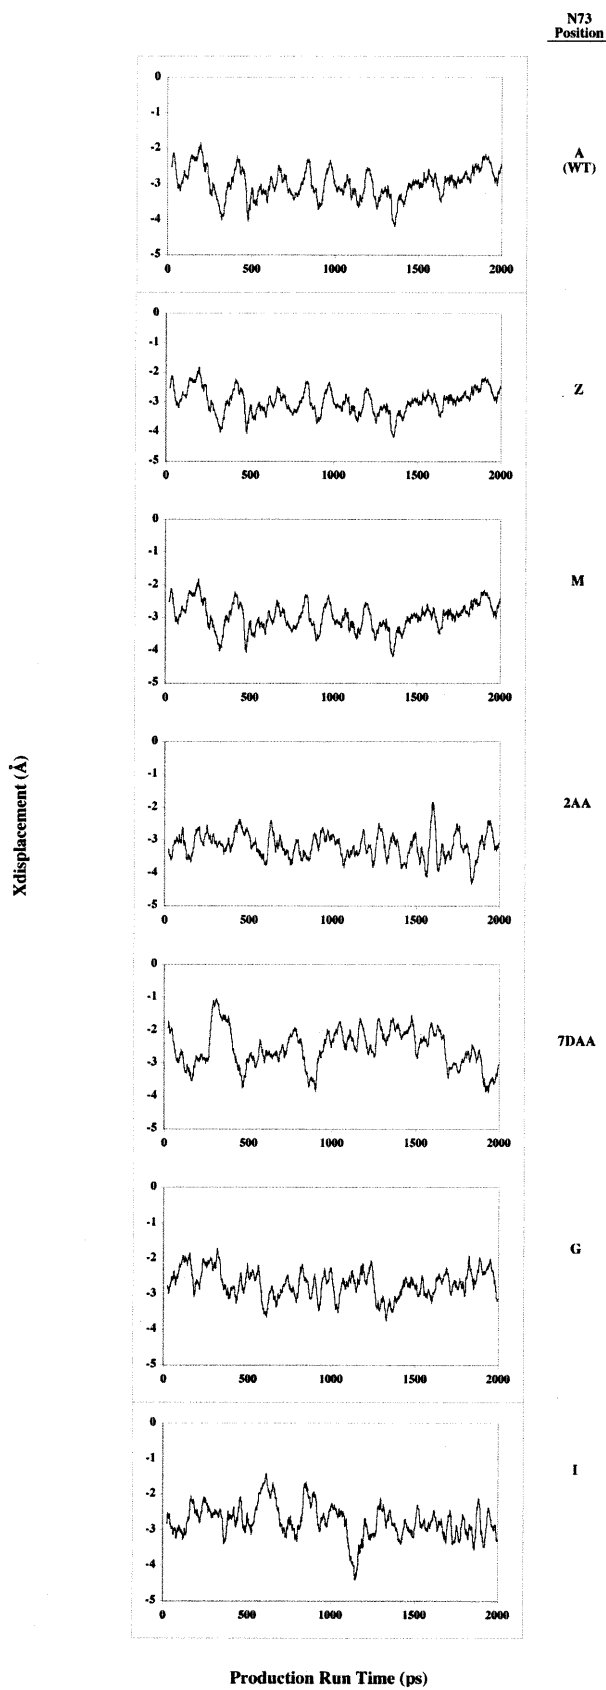

Figure S4. Average x displacement (Å) taken over the production run portion of each trajectory.

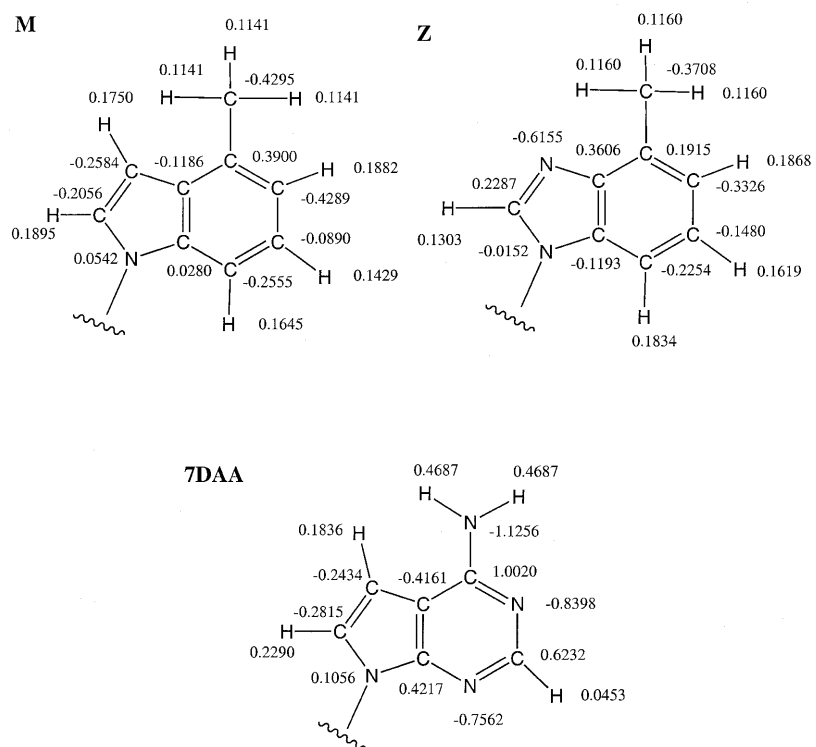

Figure S5. Partial atomic charges employed for non-standard bases 7DAA, M and Z.

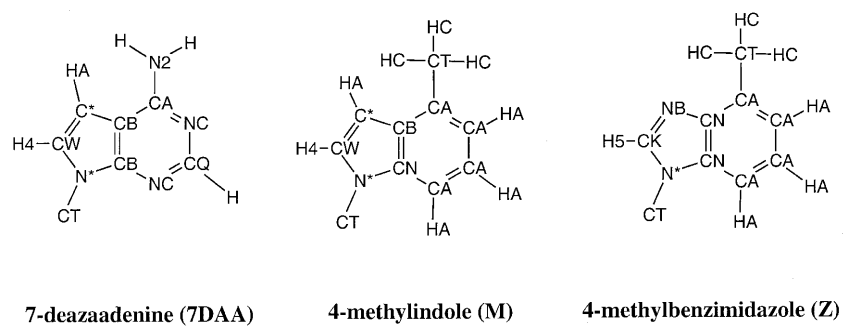

**Figure S6.** Atom types [as defined in Cornell,W.D., Cieplak,P., Bayly,C.I., Gould,I.R., Merz,K.M., Ferguson,D.M., Spellmeyer,D.C., Fox,T., Caldwell,J.W. and Kollman,P.A. (1995) *J. Am. Chem. Soc.*, **117**, 5179–5197] employed for non-standard bases 7DAA, M and Z.
